# Supplementary material
Source: Springer Nature journal article supplement (https://www.springermedizin.de/resource/supplementary/13054_2007_5392_MOESM1_ESM.pdf/9725098)

**Figure 2. Target temperature to halt cooling in heatstroke**

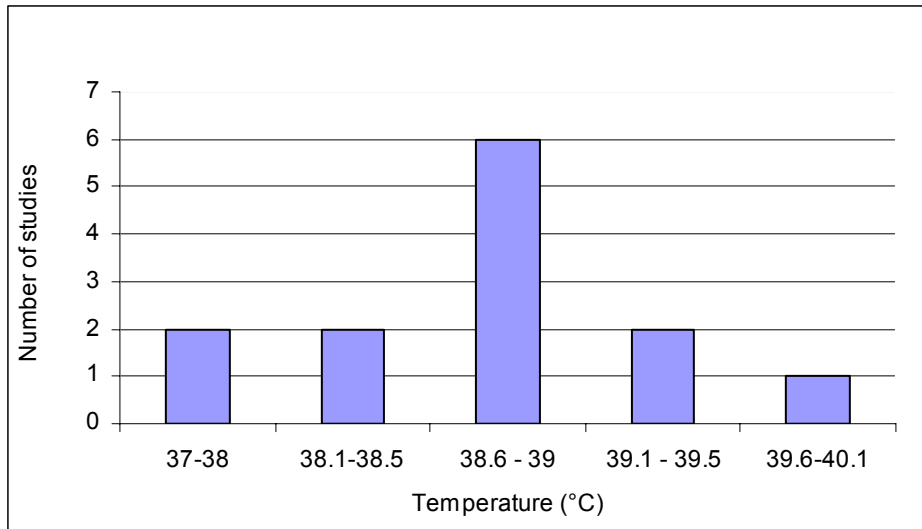

Supplement: MOESM1 [file 9725098]
